# Supplementary material for: Design, synthesis and crystal structure determination of dinuclear copper-based potential chemotherapeutic drug entities; in vitro DNA binding, cleavage studies and an evaluation of genotoxicity by micronucleus test and comet assay
Source: Royal Society of Chemistry journal article supplement (doi:10.1039/c2md20141k), 2012-11-29
Supplement: c2md20141k.pdf [file c2md20141k.pdf]

## Supplementary Material

### Design, synthesis and crystal structure determination of dinuclear copper- based potential chemotherapeutic drug entity; *in vitro* DNA binding, cleavage studies and an evaluation of genotoxicity by micronucleus test and comet assay

Farukh Arjmand<sup>a\*</sup>, Mohd. Muddassir<sup>a</sup>, Yusra Zaidi<sup>b</sup>, Debashis Ray<sup>c</sup>

<sup>a</sup>Department of Chemistry, Aligarh Muslim University, Aligarh–202002, India.

<sup>b</sup>Department of Zoology, Aligarh Muslim University, Aligarh–202002, India.

<sup>c</sup>Department of Chemistry, Indian Institute of Technology, Kharagpur, 721302, India.

\*Corresponding Author

E-mail: [farukh\\_arjmand@yahoo.co.in](mailto:farukh_arjmand@yahoo.co.in)

Tel.: +91 5712703893

#### Figure Captions

**Fig. S1.** EPR spectra of complex **1b** and **2b** at variables temperature in solid state.

**Fig. S2.** EPR spectra of complex **1b** and **2b** at variables temperature in liquid state (MeOH).

**Fig. S3.** H-bonding network of complex **1b**.

**Fig. S4.** Packing of complex **1b** along three crystallographic axes.

**Fig. S5.** Absorption spectral traces of **2a** and **2b** (a,b) in Tris HCl buffer upon addition of CT DNA at 25 °C. Inset: Plots of  $[DNA]/\epsilon_b$  vs  $[DNA]$  for the titration of CT DNA with complexes ■, experimental data points; full lines, linear fitting of the data. [complex]  $6.67 \times 10^{-6}$  M,  $[DNA]$   $0-33.3 \times 10^{-6}$  M.

**Fig. S6.** Emission spectra of **2a** and **2b** (a, b) in Tris HCl buffer DNA in the presence of DNA at 25 °C.  $[DNA]$   $0-33.3 \times 10^{-6}$  M. Arrow shows the intensity changes upon increasing concentration of the complexes.

**Fig. S7.** Fluorescence emission spectra of the EB-CT DNA system in the absence and presence of complexes. **2a** and **2b** (a,b) at 25 °C. [complex], [EB],  $[DNA] = 1 \times 10^{-5}$  M.

**Fig. S8.** CD spectra of CT DNA alone and in presence of **2a** and **2b** (a,b) in Tris HCl buffer at 25 °C. [Complex]  $= 1 \times 10^{-7}$  M,  $[DNA] = 1 \times 10^{-7}$  M. Sky blue line represent DNA alone, dark blue line represent S-enantiomer interacting with DNA and red line represent R-enantiomer interacting with DNA.

**Fig. S9.** The cleavage patterns of the agarose gel electrophoresis for pBR322 plasmid DNA (300 ng) by **1–2** (**a** and **b**) at 25 °C after 45 minutes of incubation in buffer (5mM Tris HCl/ 50 mM NaCl, pH= 7.2). Lane 1, DNA; Lane 2, 0.05 mmol metal complex+ DNA; Lane 3, 0.10 mmol metal complex + DNA; Lane 4, 0.15 mmol metal complex + DNA; Lane 5, 0. 20 mmol metal complex + DNA; Lane 6, 0.25 mmol metal complex + DNA.

**Fig. S10.** (a) Mean comet tail length (TL), (b) Mean Olive tail moment (OTM) for peripheral blood lymphocytes (PBL) in control and groups treated with CDDP, **1b**, and Extra Virgin Olive oil (EVOO) and their combination in healthy *Rattus norvegicus* (Wistar rats). Values are expressed as mean  $\pm$  SD (n=5). Values that do not share a common superscript letter differ significantly at  $p < 0.05$  (One-way ANOVA followed by Tukey test).

## Figures

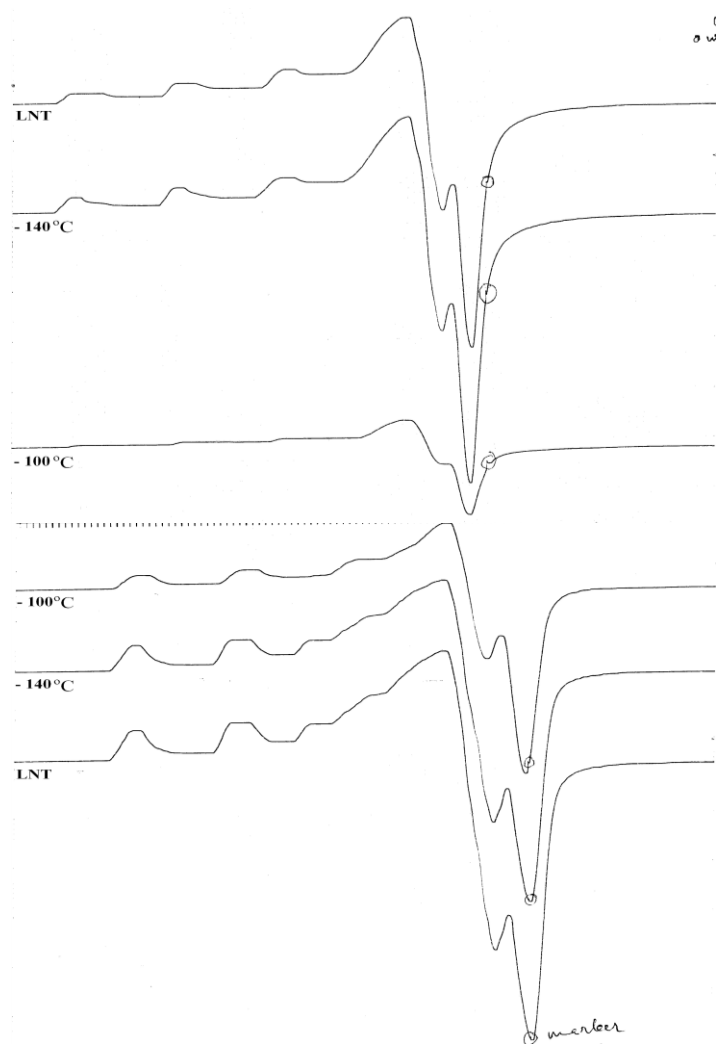

**Fig. S1**

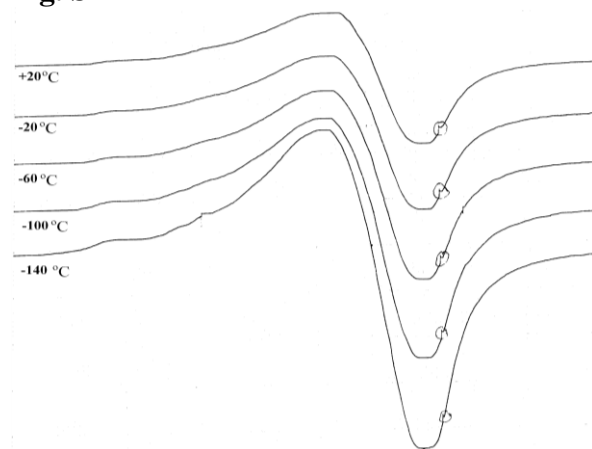

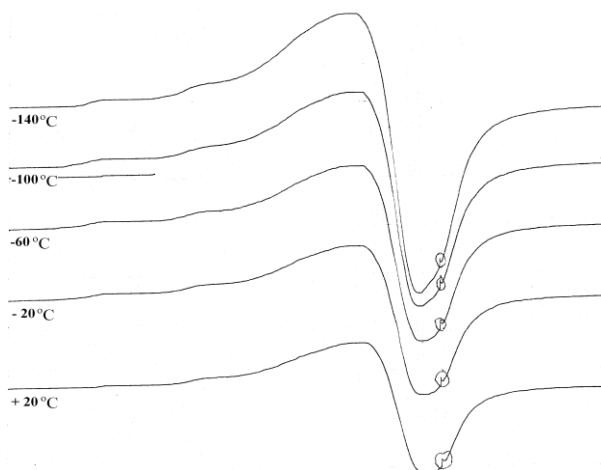

**Fig. S2**

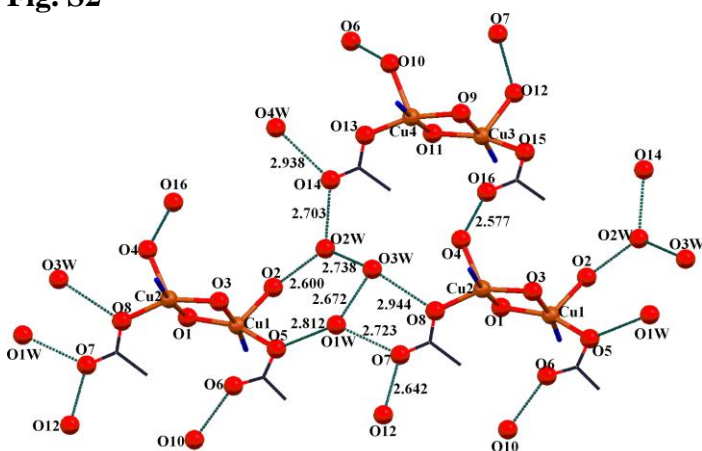

**Fig. S3**

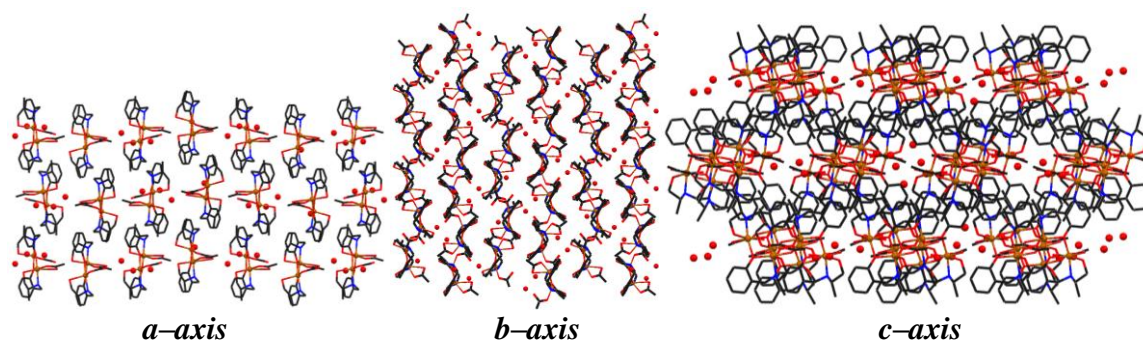

**Fig. S4**

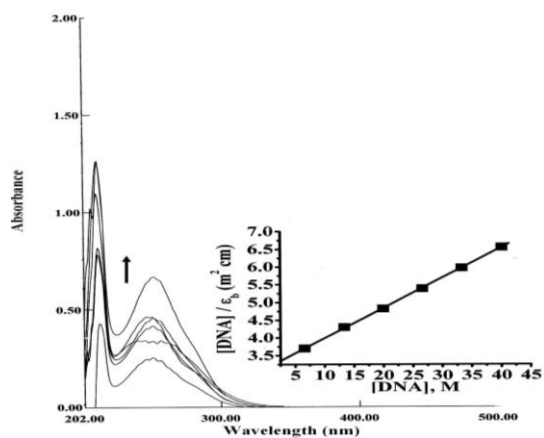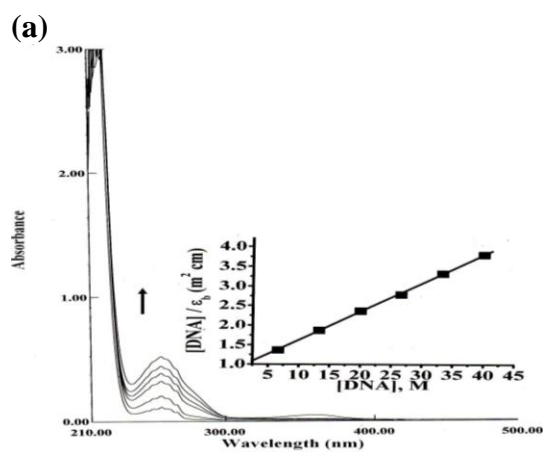

(b)

**Fig. S5**

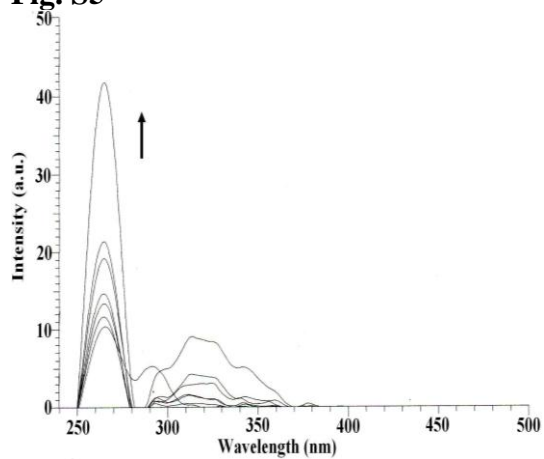

(a)

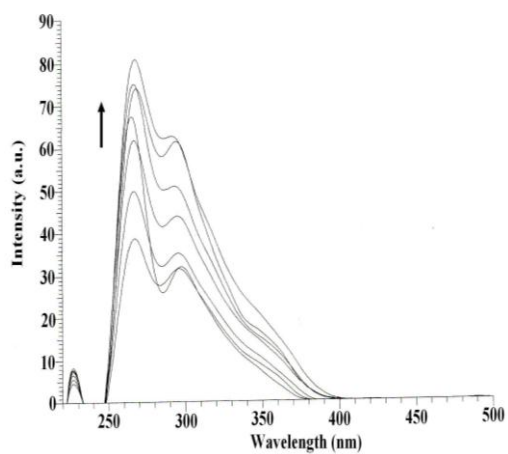

(b)

**Fig. S6**

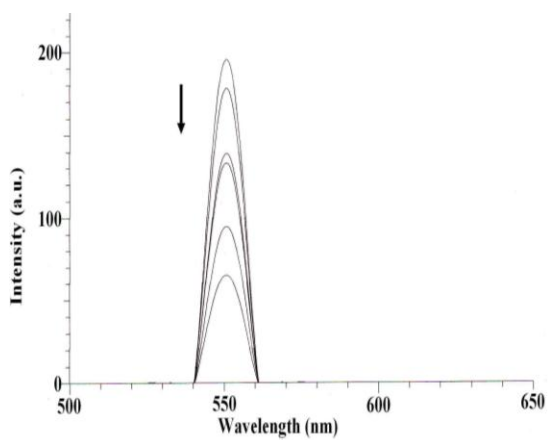

(a)

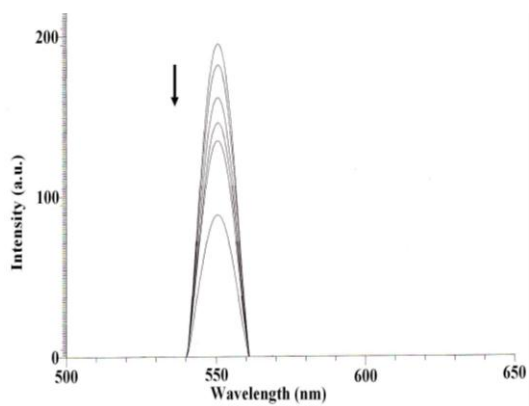

(b)

**Fig. S7**

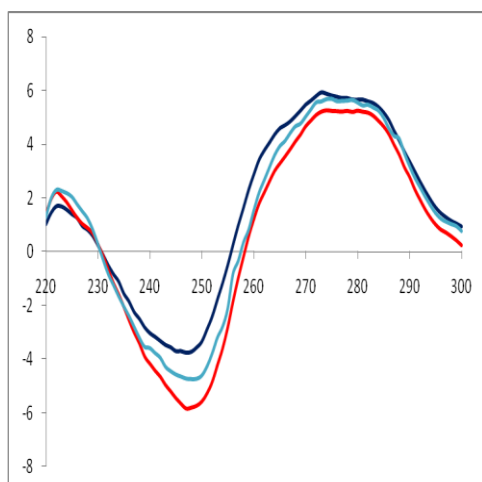

**Fig. S8**

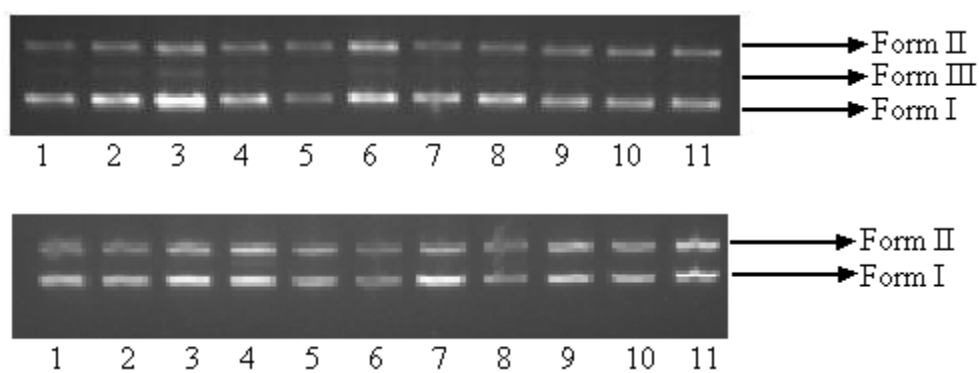

**Fig. S9**

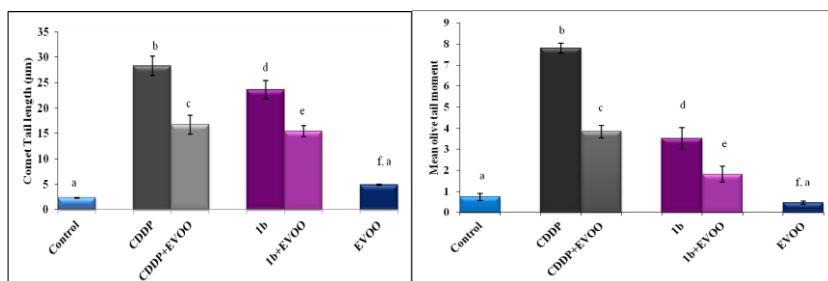

**Fig. 10**
